# Supplementary material for: Benzodi(pyridothiophene): a novel acceptor unit for application in A1–A–A1 type photovoltaic small molecules
Source: Royal Society of Chemistry journal article supplement (doi:10.1039/c5cp05474e), 2015-11-20
Supplement: c5cp05474e1.pdf [file c5cp05474e1.pdf]

*Supporting Information for*

**Benzodi(pyridothiophene): A novel acceptor unit for  
application in the A<sub>1</sub>-A-A<sub>1</sub> type photovoltaic small molecules**

Jianhua Chen,<sup>a</sup> Manjun Xiao,<sup>a,b</sup> Linrui Duan,<sup>a</sup> Qiong Wang,<sup>a</sup> Hua Tan, Ning Su,<sup>a</sup> Yu Liu,

Renqiang Yang,<sup>\*,b</sup> Weiguo Zhu<sup>\*,a</sup>

**Contents**

- 1. Thermal properties of SMs.**
- 2. The calculated frontier orbital distribution of SMs.**
- 3. Photovoltaic properties of the SMs/PC<sub>71</sub>BM-based solar cells**
- 4. NMR spectra**
- 5. MALDI-MS data**
- 6. Crystal data of BDPT**

## 1. Thermal properties of SMs

Table S1. Thermal properties of the A<sub>1</sub>-A-A<sub>1</sub> SMs

| SMs       | $T_d$ (°C) | $T_m$ (°C) | $T_c$ (°C) |
|-----------|------------|------------|------------|
| BDPT-2BT  | 447        | 274        | 258        |
| BDPT-2FBT | 451        | 331        | 323        |
| BDPT-2DPP | 423        | 295        | 266        |

## 2. The calculated frontier orbital distribution of SMs

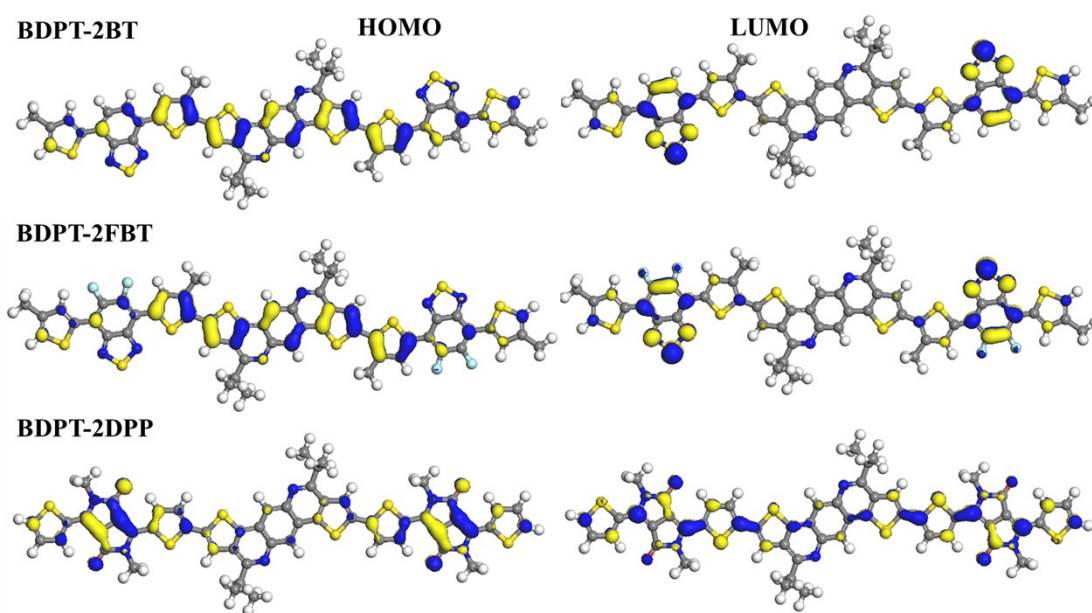

**Fig. S1.** Frontier molecular orbital distributions: HOMO (left) and LUMO (right) levels.

### 3. Photovoltaic properties of the SMs/PC<sub>71</sub>BM-based solar cells

Table S2. Photovoltaic properties of SMs/PC<sub>71</sub>BM based device under different ratios.

| SMs       | D/A ratio | DIO ratio | $V_{oc}$<br>(V) | $J_{sc}$<br>(mA/cm <sup>2</sup> ) | $FF$<br>(%) | PCE<br>(%) |
|-----------|-----------|-----------|-----------------|-----------------------------------|-------------|------------|
| BDPT-2BT  | 1:2       | No        | 0.84            | 4.17                              | 45.57       | 1.57       |
|           | 1:1       | No        | 0.84            | 5.08                              | 51.25       | 2.18       |
|           | 2:1       | No        | 0.75            | 5.28                              | 50.60       | 2.01       |
|           | 1:1       | 1%        | 0.58            | 2.20                              | 30.29       | 0.38       |
| BDPT-2FBT | 1:2       | No        | 0.70            | 4.04                              | 53.38       | 1.50       |
|           | 1:1       | No        | 0.80            | 6.83                              | 48.07       | 2.63       |
|           | 2:1       | No        | 0.70            | 7.44                              | 45.26       | 2.35       |
|           | 1:1       | 1%        | 0.77            | 6.0                               | 37.58       | 1.74       |
| BDPT-2DPP | 1:2       | No        | 0.70            | 1.19                              | 52.85       | 0.44       |
|           | 1:2       | 1%        | 0.82            | 5.69                              | 42.82       | 1.99       |
|           | 1:1       | No        | 0.73            | 1.55                              | 47.00       | 0.53       |
|           | 1:1       | 1%        | 0.84            | 8.00                              | 46.12       | 3.09       |
|           | 2:1       | No        | 0.81            | 1.47                              | 45.86       | 0.54       |
|           | 2:1       | 1%        | 0.89            | 6.82                              | 49.12       | 2.98       |
|           | 1.5:1     | 1%        | 0.84            | 9.0                               | 52.37       | 3.97       |

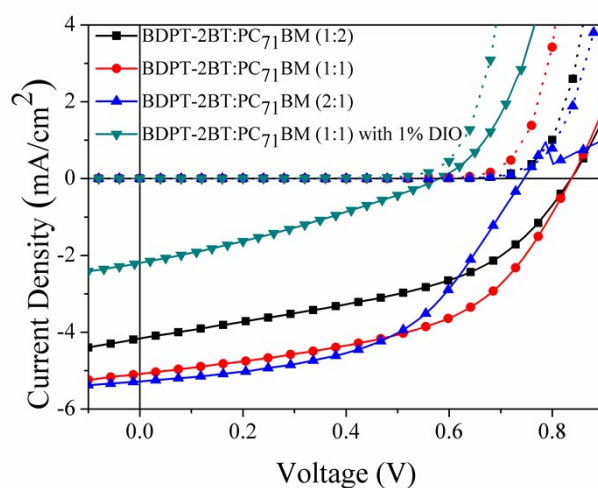

**Fig. S2.**  $J$ - $V$  characteristics of BDPT-2BT/PC<sub>71</sub>BM based device (The dashed lines plus symbols represent the corresponding dark currents).

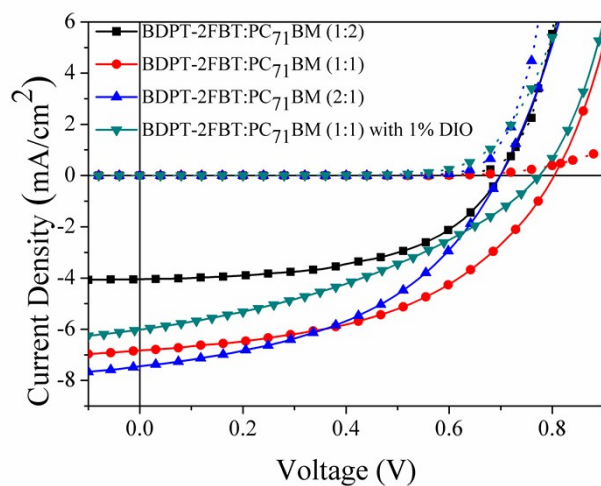

**Fig. S3.**  $J-V$  characteristics of BDPT-2FBT/PC<sub>71</sub>BM based device (The dashed lines plus symbols represent the corresponding dark currents).

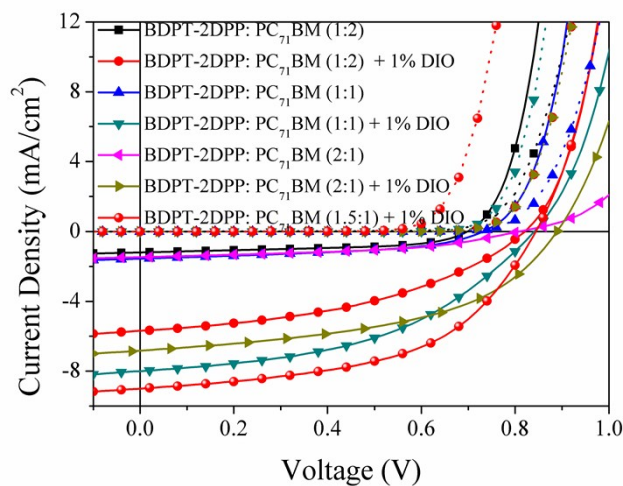

**Fig. S4.**  $J-V$  characteristics of BDPT-2DPP/PC<sub>71</sub>BM based device (The dashed lines plus symbols represent the corresponding dark currents).

## 4. NMR spectra

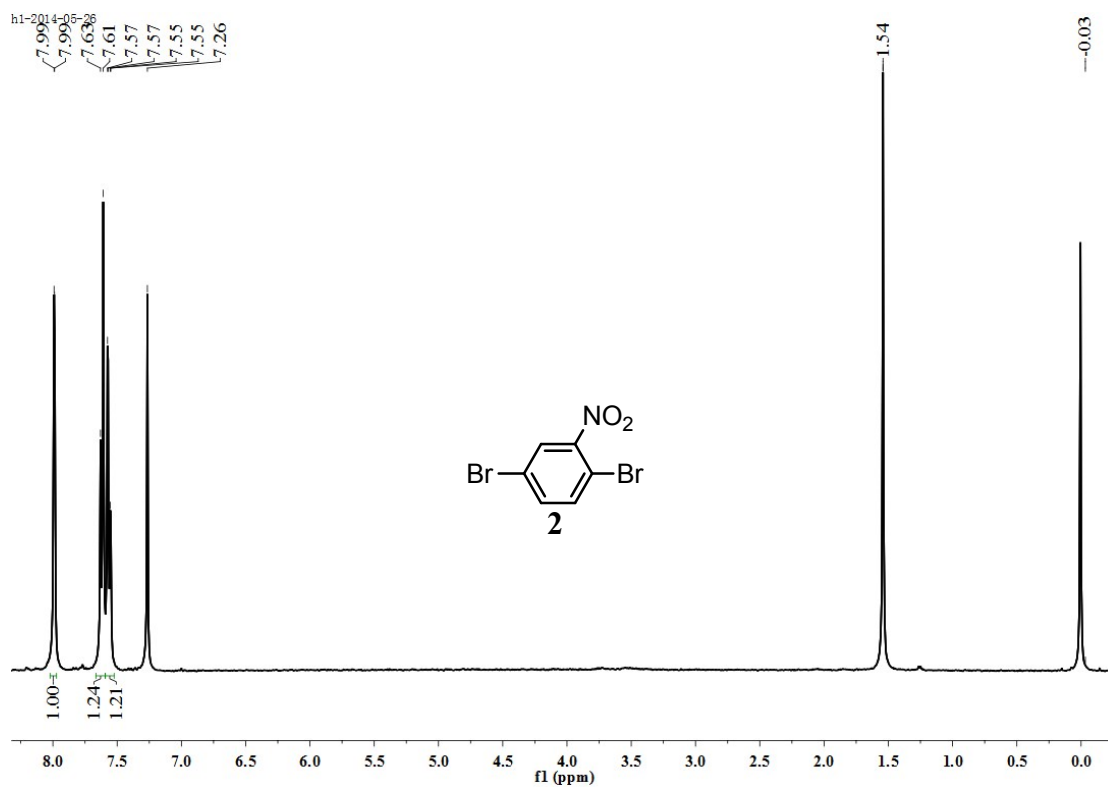

Fig. S5. <sup>1</sup>H-NMR of compound 2.

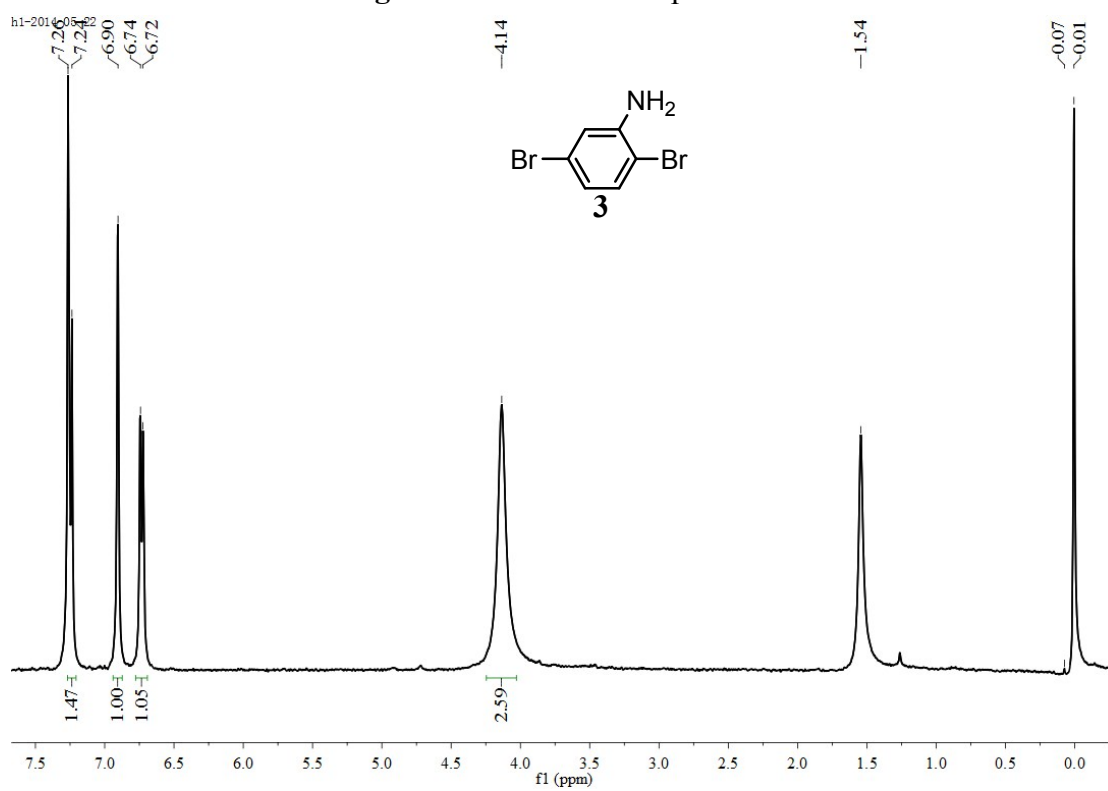

Fig. S6. <sup>1</sup>H-NMR of compound 3.

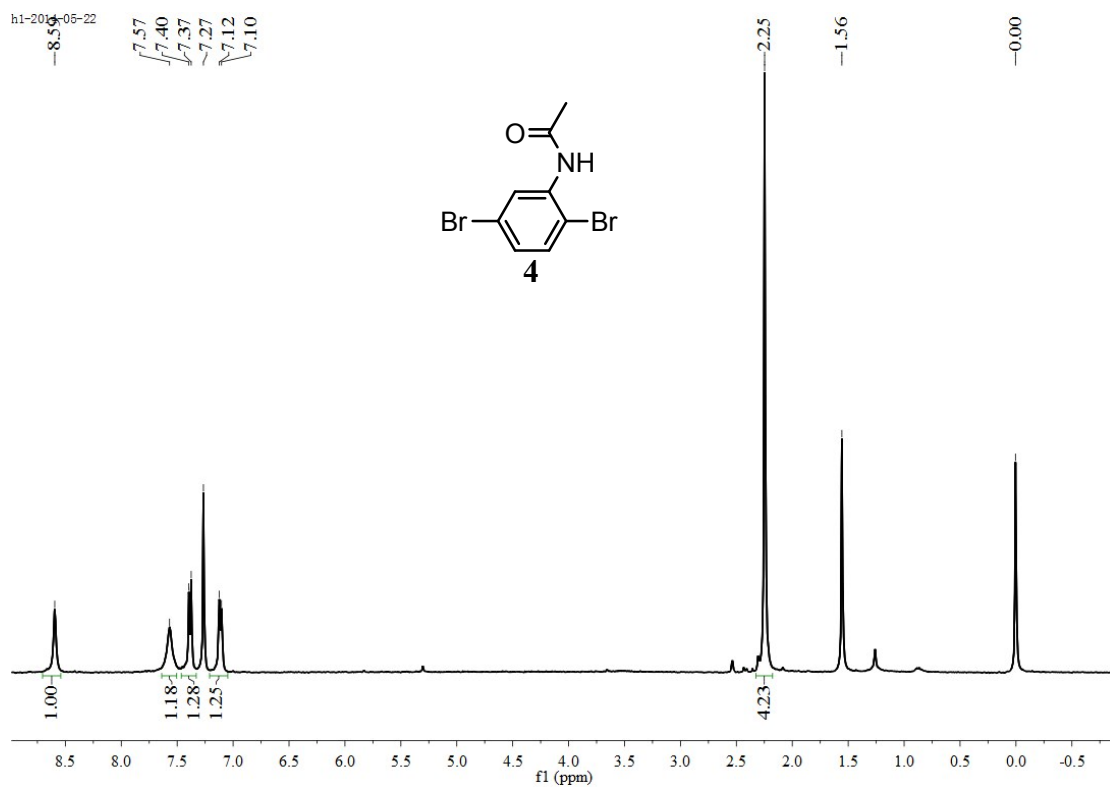

Fig. S7.  $^1\text{H-NMR}$  of compound 4.

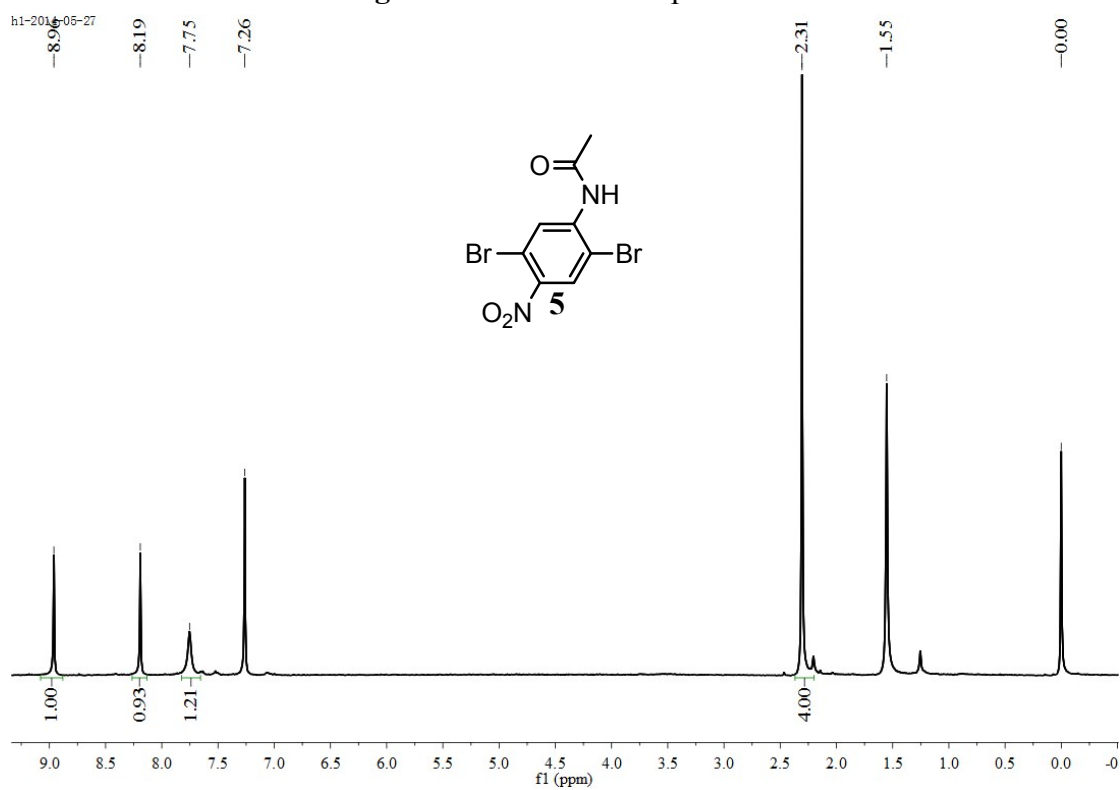

Fig. S8.  $^1\text{H-NMR}$  of compound 5.

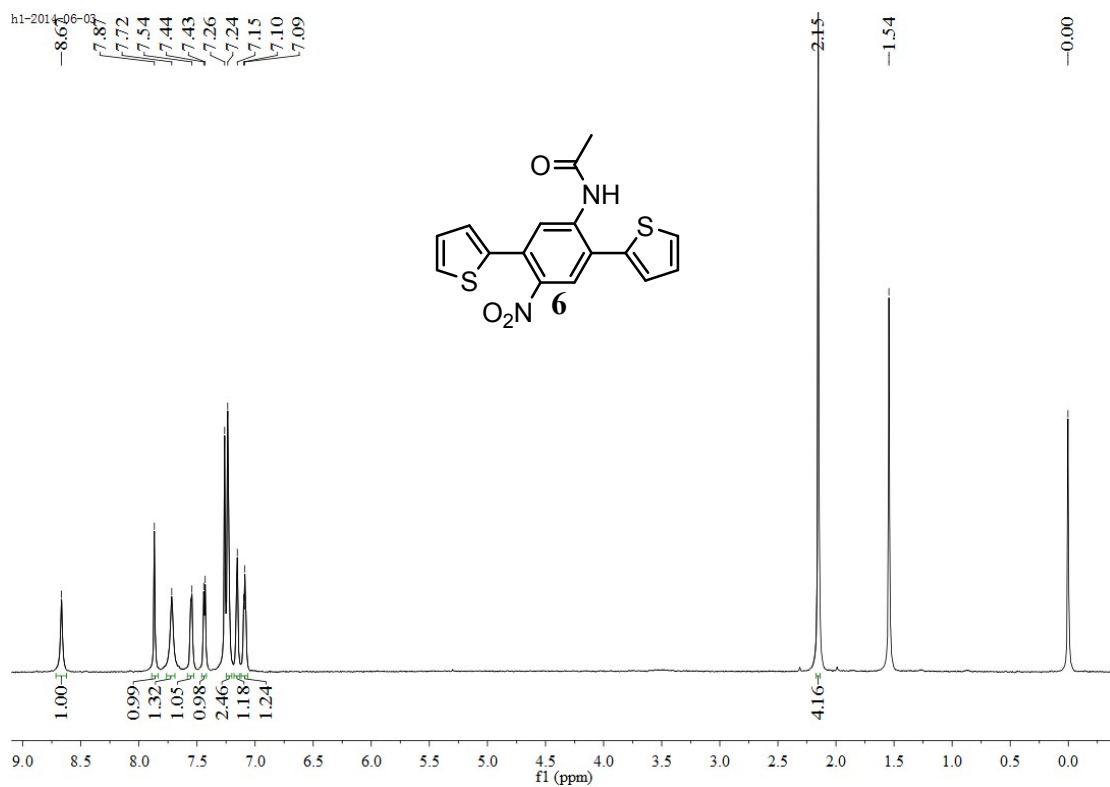

Fig. S9.  $^1\text{H-NMR}$  of compound 6.

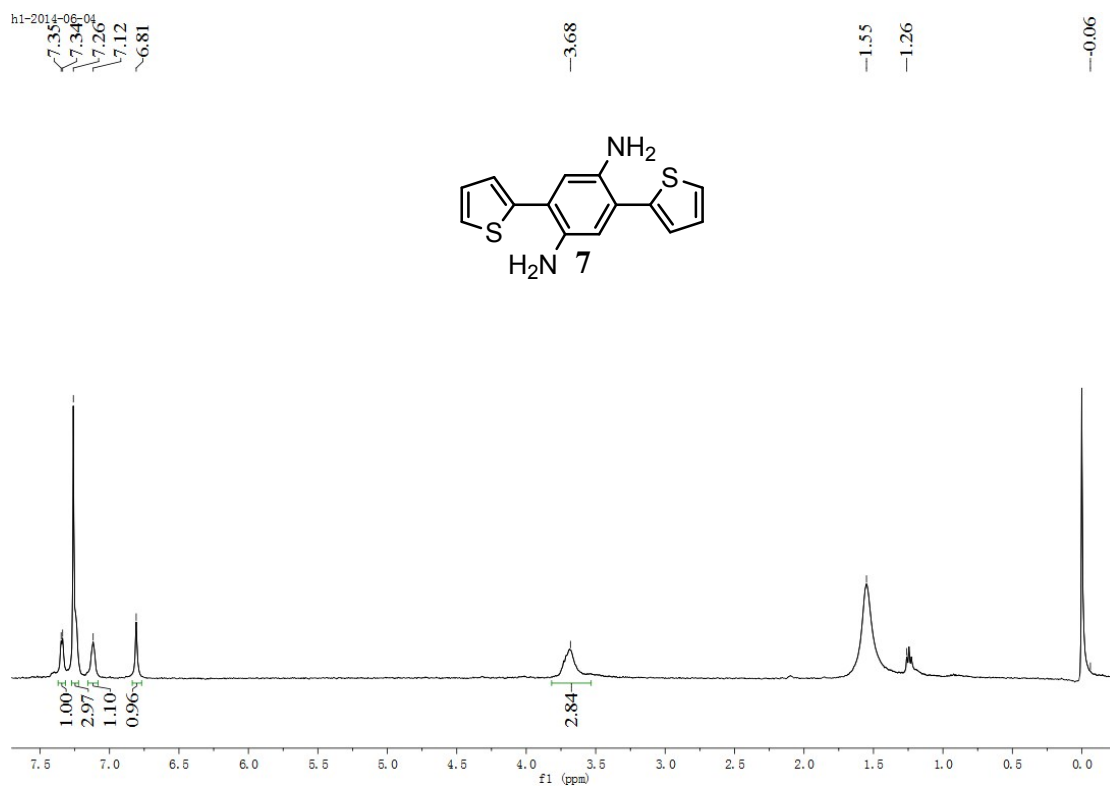

Fig. S10.  $^1\text{H-NMR}$  of compound 7.

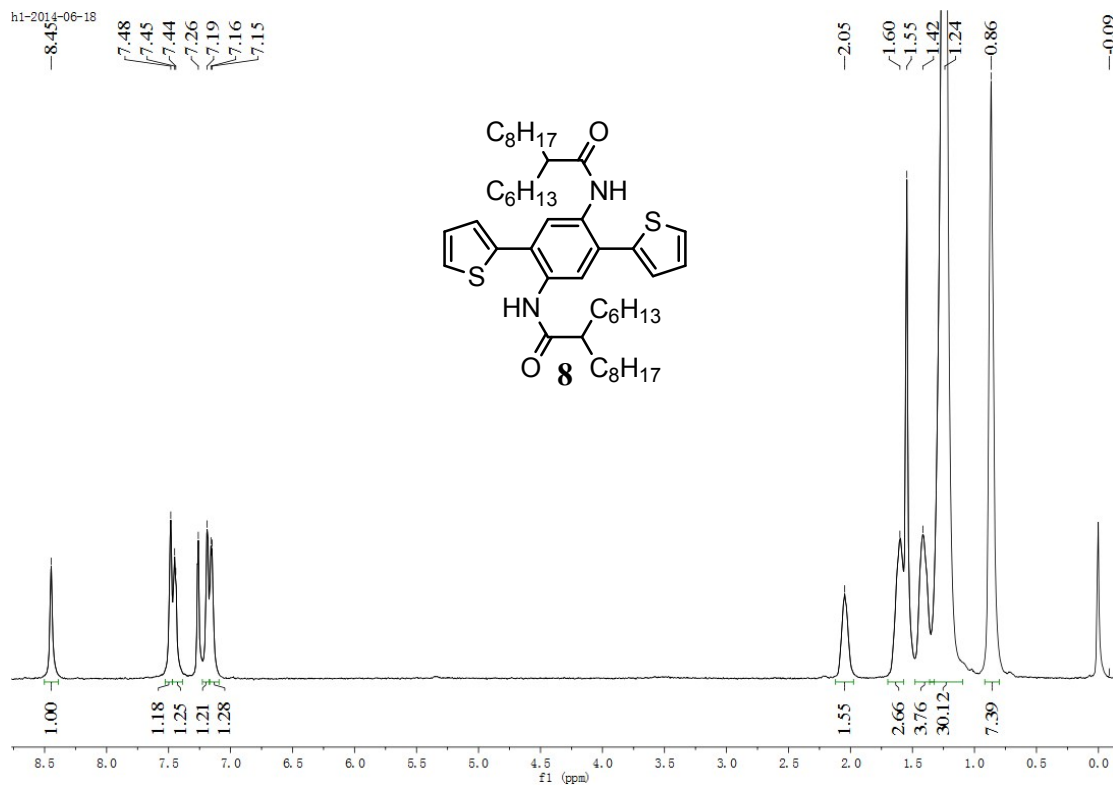

**Fig. S11.** <sup>1</sup>H-NMR of compound **8**.

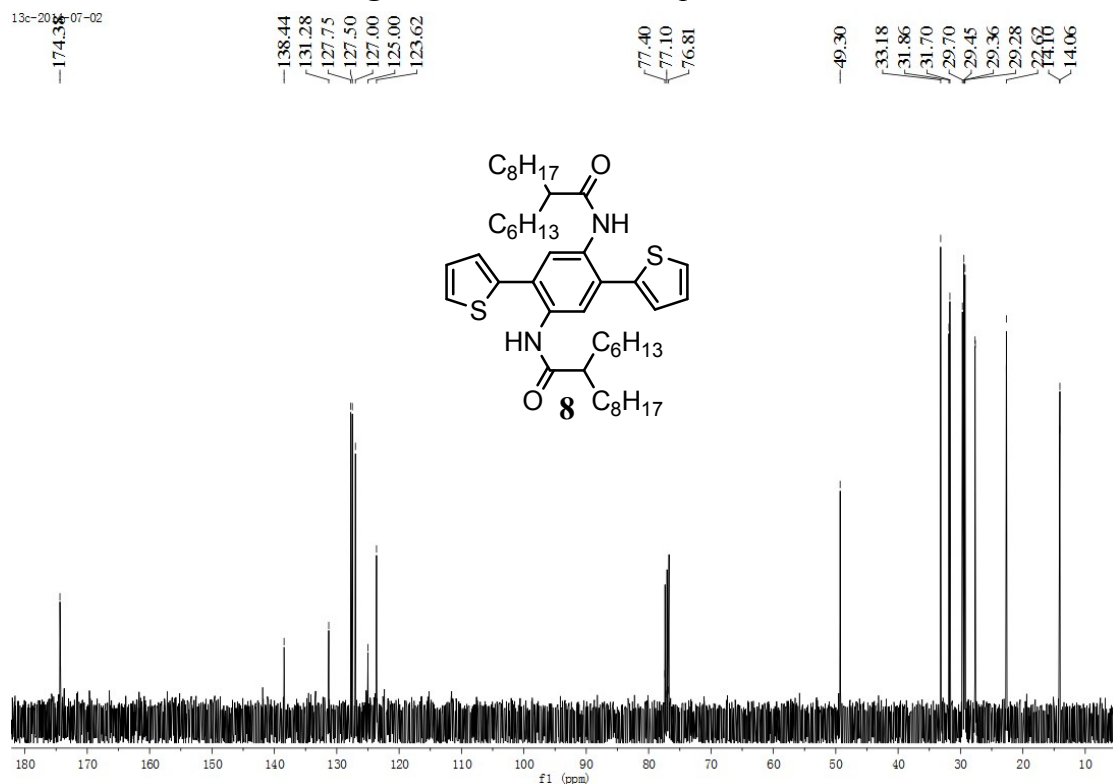

**Fig. S12.** <sup>13</sup>C-NMR of compound **8**.



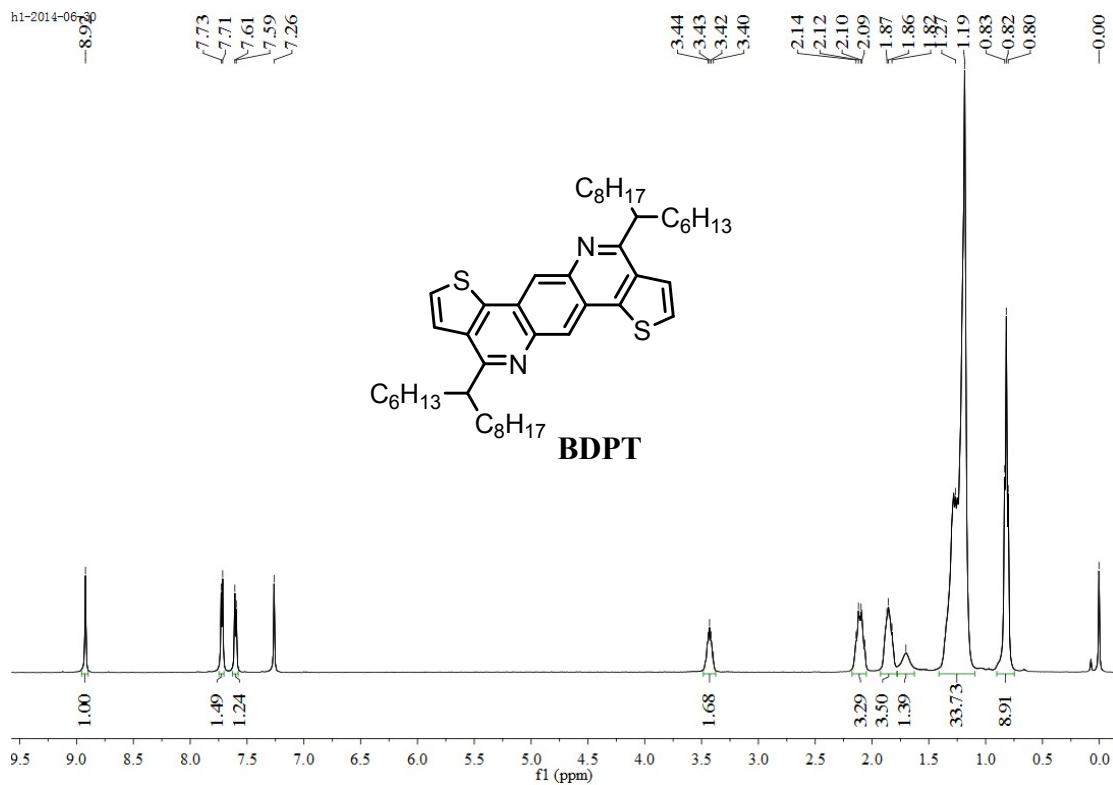

**Fig. S13.**  $^1\text{H-NMR}$  of compound **BDPT**.

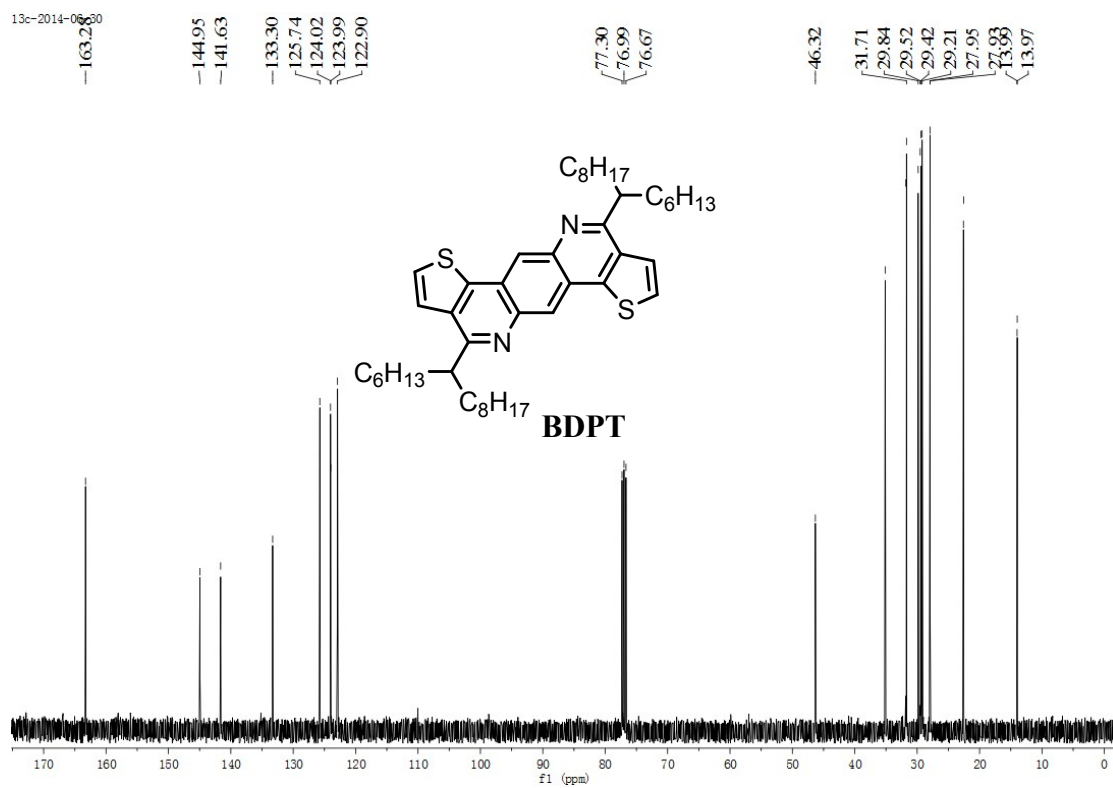

**Fig. S14.**  $^{13}\text{C-NMR}$  of compound **BDPT**.

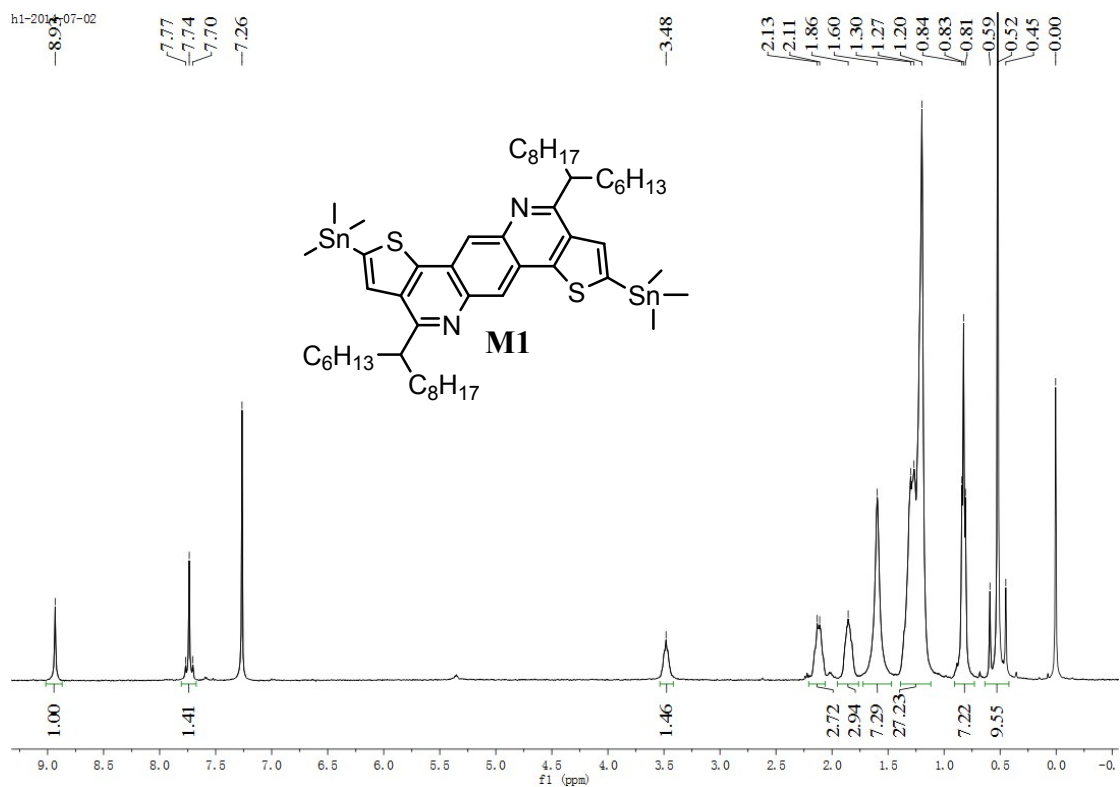

**Fig. S15.** <sup>1</sup>H-NMR of compound M1.

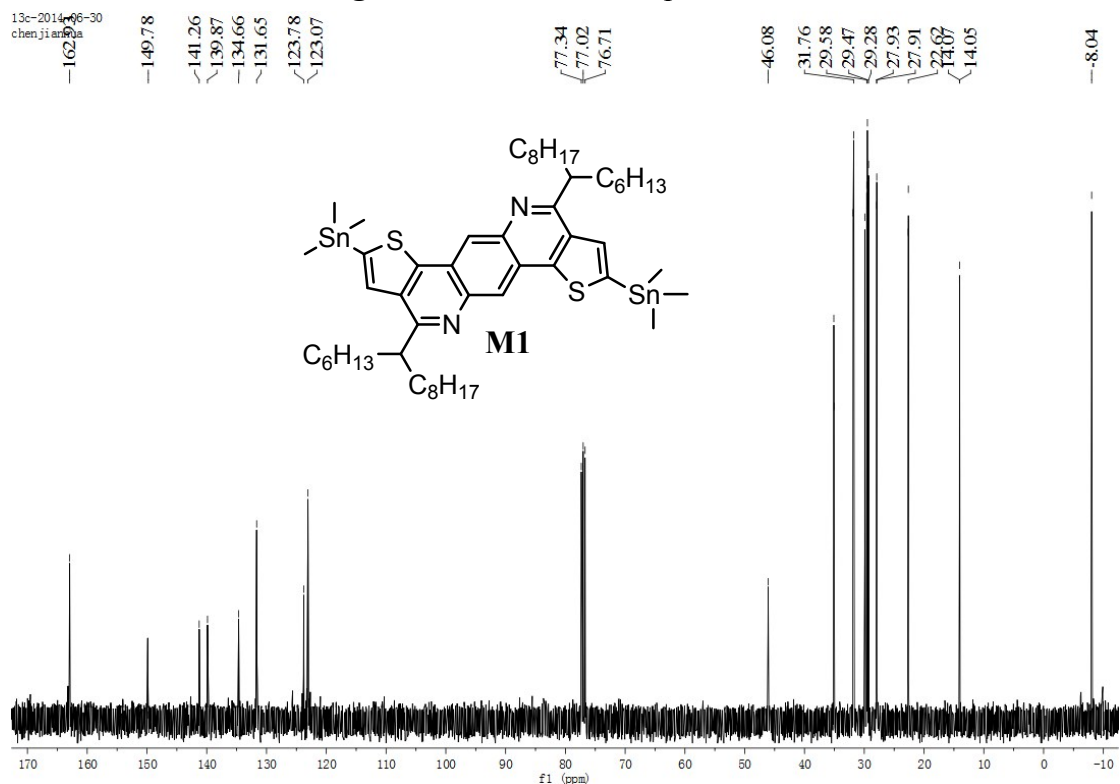

**Fig. S16.** <sup>13</sup>C-NMR of compound M1.

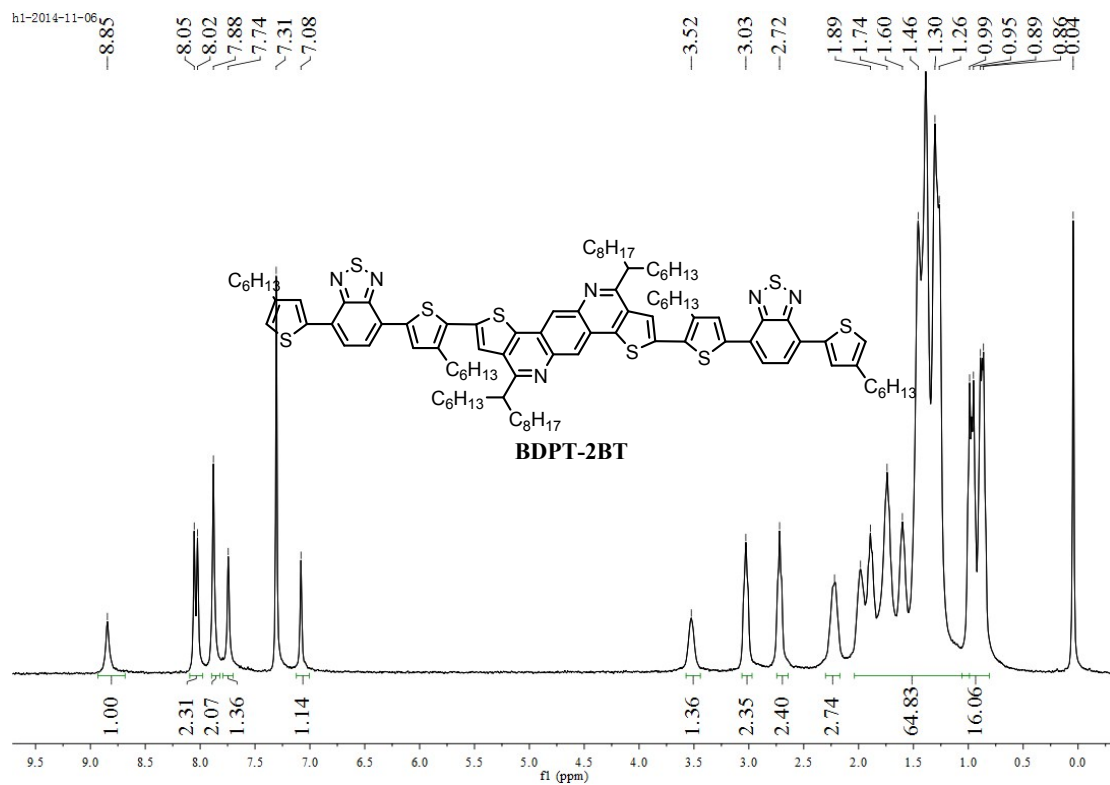

**Fig. S17.**  $^1\text{H-NMR}$  of compound **BDPT-2BT**.

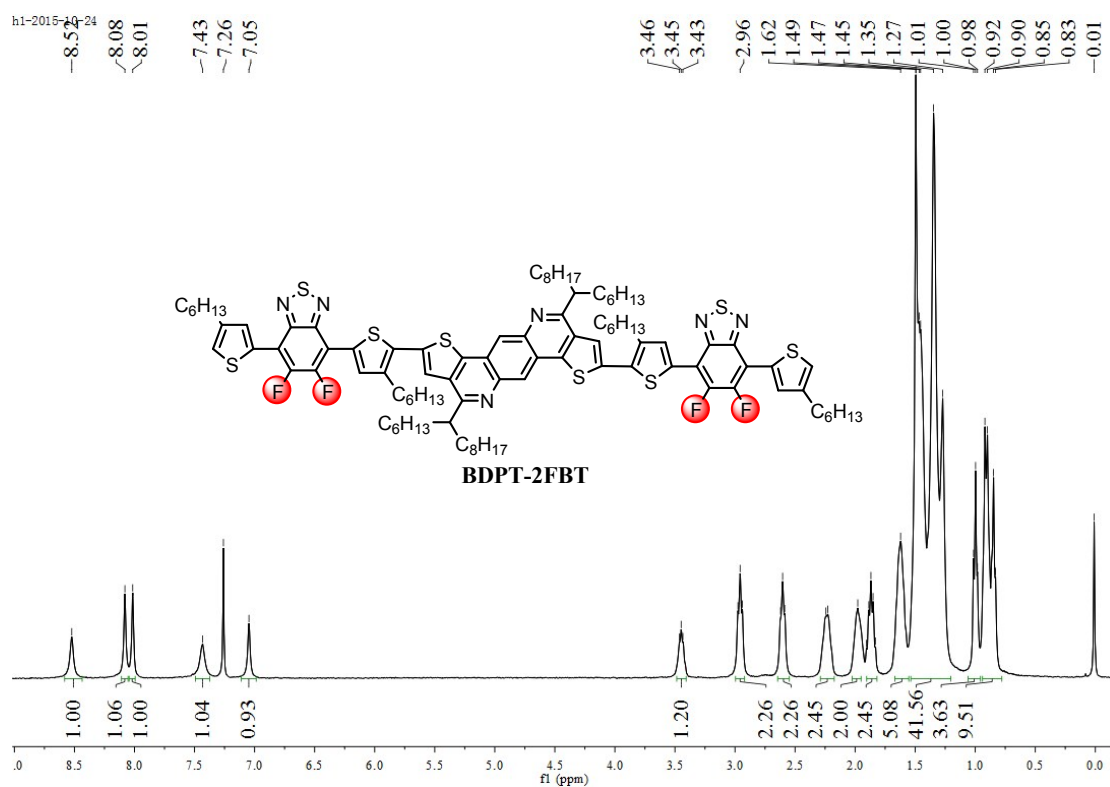

**Fig. S18.**  $^1\text{H-NMR}$  of compound **BDPT-2FBT**.

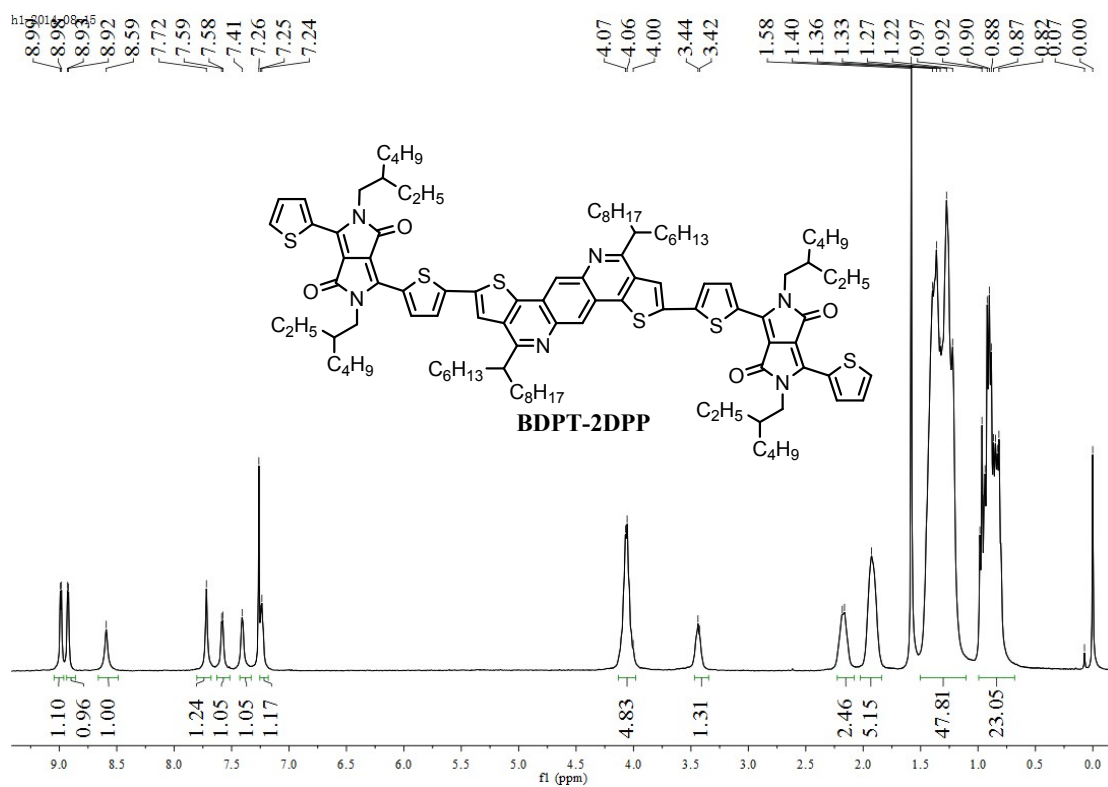

**Fig. S19.** <sup>1</sup>H-NMR of compound TPTQ-2DPP.

## 5. MALDI-MS data

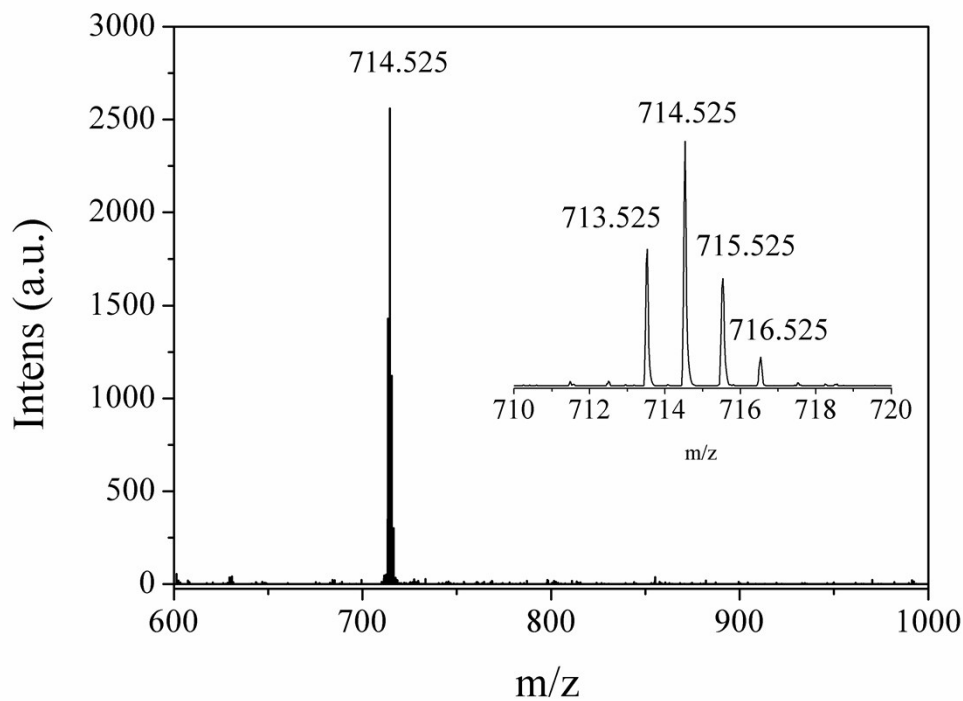

**Fig. S20.** MS of compound BDPT.

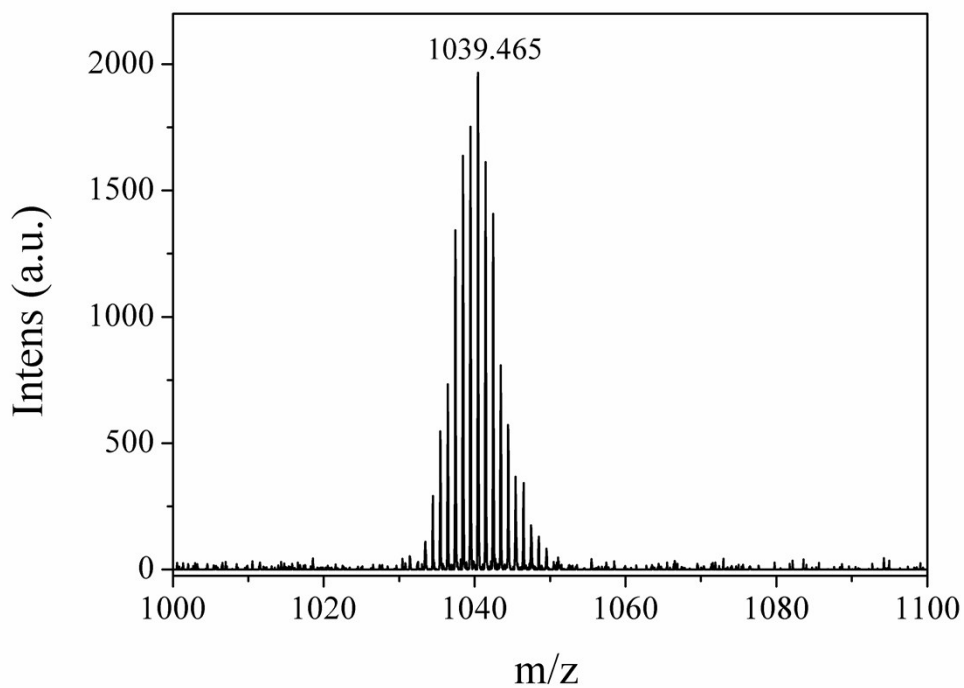

**Fig. S21.** MS of compound **M1**.

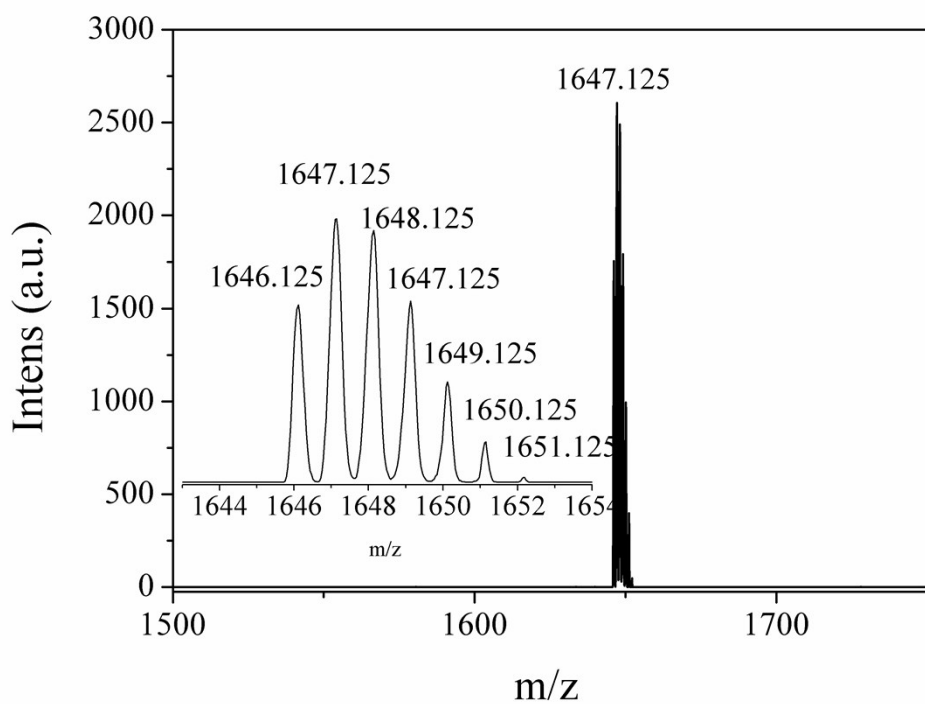

**Fig. S22.** MS of compound **BDPT-2BT**.

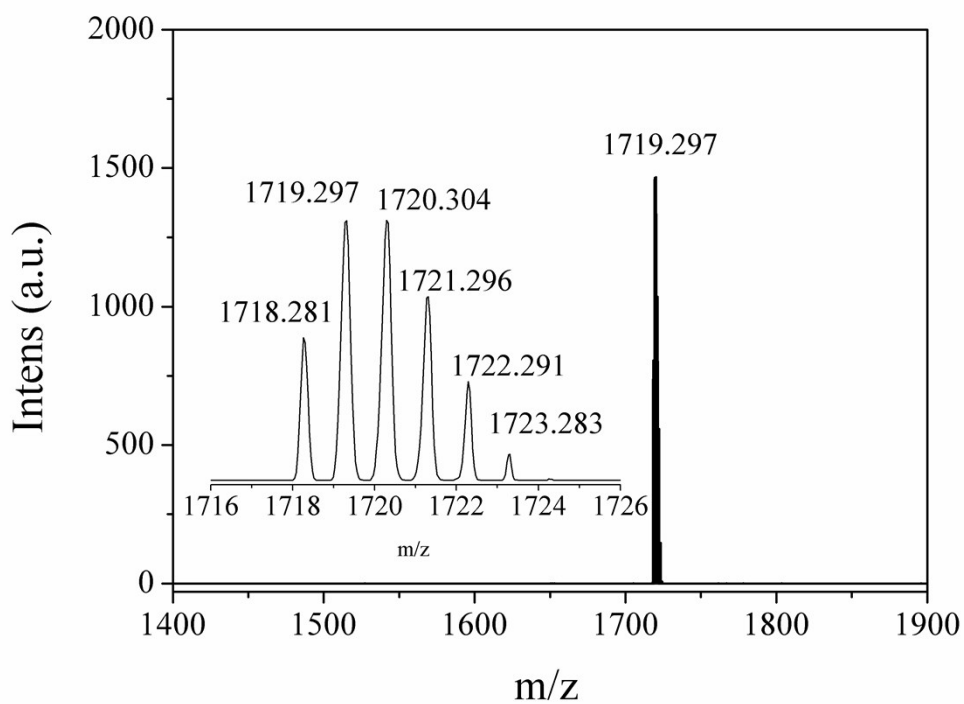

**Fig. S23.** MS of compound **BDPT-2FBT**.

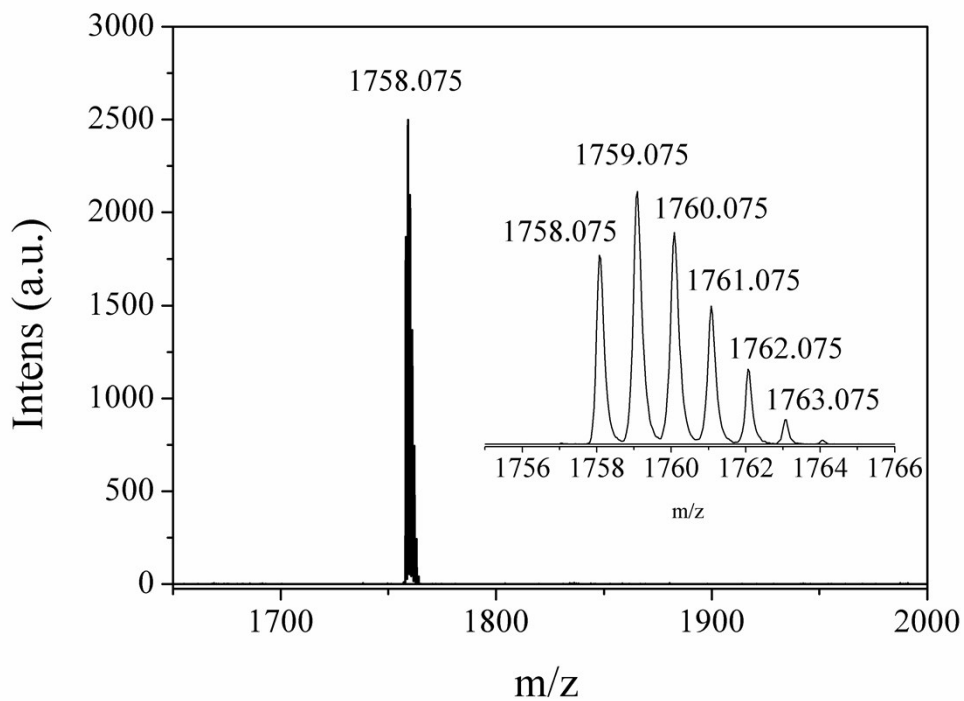

**Fig. S24.** MS of compound **BDPT-2DPP**.

## 6. Crystal data of BDPT

### Computing details

Data collection: *CrysAlis PRO*, Agilent Technologies, Version 1.171.35.21 (release 20-01-2012 CrysAlis171 .NET) (compiled Jan 23 2012,18:06:46); cell refinement: *CrysAlis PRO*, Agilent Technologies, Version 1.171.35.21 (release 20-01-2012 CrysAlis171 .NET) (compiled Jan 23 2012,18:06:46); data reduction: *CrysAlis PRO*, Agilent Technologies, Version 1.171.35.21 (release 20-01-2012 CrysAlis171 .NET) (compiled Jan 23 2012,18:06:46); program(s) used to solve structure: XS, G.M. Sheldrick, Acta Cryst. (2008). A64, 112-122; program(s) used to refine structure: XL, G.M. Sheldrick, Acta Cryst. (2008). A64, 112-122; molecular graphics: O. V. Dolomanov, L. J. Bourhis, R. J. Gildea, J. A. K. Howard and H. Puschmann, OLEX2: a complete structure solution, refinement and analysis program. J. Appl. Cryst. (2009). 42, 339-341.; software used to prepare material for publication: O. V. Dolomanov, L. J. Bourhis, R. J. Gildea, J. A. K. Howard and H. Puschmann, OLEX2: a complete structure solution, refinement and analysis program. J. Appl. Cryst. (2009). 42, 339-341.

### Crystal data

|                                 |                                                        |
|---------------------------------|--------------------------------------------------------|
| $C_{46}H_{68}N_2S_2$            | $Z = 1$                                                |
| $M_r = 713.14$                  | $F(000) = 390$                                         |
| Triclinic, $P\bar{1}$           | $D_x = 1.120 \text{ Mg m}^{-3}$                        |
| $a = 5.51930 (13) \text{ \AA}$  | Mo $K\alpha$ radiation, $\lambda = 0.7107 \text{ \AA}$ |
| $b = 8.7116 (2) \text{ \AA}$    | Cell parameters from 3998 reflections                  |
| $c = 23.1468 (6) \text{ \AA}$   | $q = 3.9\text{--}28.4^\circ$                           |
| $\alpha = 84.894 (2)^\circ$     | $m = 0.16 \text{ mm}^{-1}$                             |
| $\beta = 88.701 (2)^\circ$      | $T = 293 \text{ K}$                                    |
| $\gamma = 72.509 (2)^\circ$     | $0.20 \times 0.08 \times 0.05 \text{ mm}$              |
| $V = 1057.26 (5) \text{ \AA}^3$ |                                                        |

### Data collection

|                                                        |                                                              |
|--------------------------------------------------------|--------------------------------------------------------------|
| SuperNova, Single source at offset, Eos diffractometer | 4291 independent reflections                                 |
| Radiation source: SuperNova (Mo) X-ray Source          | 3654 reflections with $I > 2\sigma(I)$                       |
| mirror                                                 | $R_{\text{int}} = 0.018$                                     |
| Detector resolution: 15.9784 pixels $\text{mm}^{-1}$   | $q_{\text{max}} = 26.4^\circ$ , $q_{\text{min}} = 3.5^\circ$ |

|                                                                                                                                                                                                                                                                                                          |                         |
|----------------------------------------------------------------------------------------------------------------------------------------------------------------------------------------------------------------------------------------------------------------------------------------------------------|-------------------------|
| 1                                                                                                                                                                                                                                                                                                        |                         |
| w scans                                                                                                                                                                                                                                                                                                  | $h = -6 \text{ @ } 6$   |
| Absorption correction: multi-scan<br><i>CrysAlis PRO</i> , Agilent Technologies,<br>Version 1.171.36.32 (release 02-08-<br>2013 CrysAlis171 .NET) (compiled<br>Aug 2 2013,16:46:58) Empirical<br>absorption correction using spherical<br>harmonics, implemented in SCALE3<br>ABSPACK scaling algorithm. | $k = -10 \text{ @ } 10$ |
| $T_{\min} = 0.799$ , $T_{\max} = 1.000$                                                                                                                                                                                                                                                                  | $l = -28 \text{ @ } 28$ |
| 8615 measured reflections                                                                                                                                                                                                                                                                                |                         |

#### Refinement

|                            |                                                                                |
|----------------------------|--------------------------------------------------------------------------------|
| Refinement on $F^2$        | Primary atom site location: structure-<br>invariant direct methods             |
| Least-squares matrix: full | Secondary atom site location: difference<br>Fourier map                        |
| $R[F^2 > 2s(F^2)] = 0.061$ | Hydrogen site location: inferred from<br>neighbouring sites                    |
| $wR(F^2) = 0.194$          | H atoms treated by a mixture of<br>independent and constrained refinement      |
| $S = 1.09$                 | $w = 1/[s^2(F_o^2) + (0.1018P)^2 + 0.5124P]$<br>where $P = (F_o^2 + 2F_c^2)/3$ |
| 4291 reflections           | $(D/s)_{\max} < 0.001$                                                         |
| 228 parameters             | $D\rho_{\max} = 0.41 \text{ e } \text{\AA}^{-3}$                               |
| 25 restraints              | $D\rho_{\min} = -0.42 \text{ e } \text{\AA}^{-3}$                              |

#### Special details

**Geometry.** All esds (except the esd in the dihedral angle between two l.s. planes) are estimated using the full covariance matrix. The cell esds are taken into account individually in the estimation of esds in distances, angles and torsion angles; correlations between esds in cell parameters are only used when they are defined by crystal symmetry. An approximate (isotropic) treatment of cell esds is used for estimating esds involving l.s. planes.

**Refinement.** Refinement of  $F^2$  against ALL reflections. The weighted R-factor  $wR$



and goodness of fit  $S$  are based on  $F^2$ , conventional R-factors  $R$  are based on  $F$ , with  $F$  set to zero for negative  $F^2$ . The threshold expression of  $F^2 > 2\sigma(F^2)$  is used only for calculating R-factors(gt) etc. and is not relevant to the choice of reflections for refinement. R-factors based on  $F^2$  are statistically about twice as large as those based on  $F$ , and R-factors based on ALL data will be even larger.

Fractional atomic coordinates and isotropic or equivalent isotropic displacement parameters ( $\text{\AA}^2$ )

|      | $x$          | $y$         | $z$          | $U_{\text{iso}}^*/U_{\text{eq}}$ |
|------|--------------|-------------|--------------|----------------------------------|
| S1   | 0.78841 (12) | 0.87107 (7) | 0.03308 (3)  | 0.0417 (2)                       |
| N1   | 0.8595 (4)   | 0.3484 (2)  | 0.08695 (8)  | 0.0341 (4)                       |
| C1   | 0.4593 (4)   | 0.6612 (3)  | -0.02103 (9) | 0.0324 (5)                       |
| H1   | 0.4330       | 0.7685      | -0.0348      | 0.039*                           |
| C2   | 0.6400 (4)   | 0.5915 (3)  | 0.02232 (9)  | 0.0309 (5)                       |
| C3   | 0.6822 (4)   | 0.4269 (3)  | 0.04403 (9)  | 0.0317 (5)                       |
| C4   | 0.9990 (4)   | 0.4274 (3)  | 0.10880 (9)  | 0.0332 (5)                       |
| C5   | 0.9721 (4)   | 0.5938 (3)  | 0.09055 (9)  | 0.0333 (5)                       |
| C6   | 1.1086 (5)   | 0.6979 (3)  | 0.10930 (10) | 0.0396 (5)                       |
| H6   | 1.2384       | 0.6652      | 0.1368       | 0.048*                           |
| C7   | 1.0268 (5)   | 0.8482 (3)  | 0.08251 (11) | 0.0445 (6)                       |
| H7   | 1.0927       | 0.9310      | 0.0900       | 0.053*                           |
| C8   | 0.7924 (4)   | 0.6734 (3)  | 0.04845 (9)  | 0.0321 (5)                       |
| C9   | 1.1951 (4)   | 0.3402 (3)  | 0.15501 (10) | 0.0365 (5)                       |
| H9   | 1.3502       | 0.3690      | 0.1448       | 0.044*                           |
| C10  | 1.2643 (5)   | 0.1562 (3)  | 0.15526 (11) | 0.0393 (5)                       |
| H10A | 1.1205       | 0.1223      | 0.1697       | 0.047*                           |
| H10B | 1.2950       | 0.1272      | 0.1157       | 0.047*                           |
| C11  | 1.4980 (5)   | 0.0639 (3)  | 0.19212 (13) | 0.0497 (7)                       |
| H11A | 1.6480       | 0.0804      | 0.1732       | 0.060*                           |
| H11B | 1.4829       | 0.1085      | 0.2295       | 0.060*                           |
| C12  | 1.5339 (6)   | -0.1166 (3) | 0.20197 (13) | 0.0535 (7)                       |
| H12A | 1.5336       | -0.1587     | 0.1646       | 0.064*                           |

|      |             |              |              |             |
|------|-------------|--------------|--------------|-------------|
| H12B | 1.6996      | -0.1687      | 0.2195       | 0.064*      |
| C13  | 1.3343 (6)  | -0.1628 (4)  | 0.24011 (13) | 0.0614 (8)  |
| H13A | 1.1683      | -0.1082      | 0.2232       | 0.074*      |
| H13B | 1.3620      | -0.2781      | 0.2398       | 0.074*      |
| C14  | 1.3318 (8)  | -0.1231 (6)  | 0.30218 (17) | 0.0828 (11) |
| H14A | 1.3080      | -0.0083      | 0.3028       | 0.099*      |
| H14B | 1.4954      | -0.1806      | 0.3198       | 0.099*      |
| C15  | 1.1250 (11) | -0.1670 (8)  | 0.3378 (2)   | 0.1180 (18) |
| H15A | 0.9619      | -0.1122      | 0.3195       | 0.142*      |
| H15B | 1.1519      | -0.2823      | 0.3382       | 0.142*      |
| C16  | 1.118 (2)   | -0.1233 (16) | 0.3981 (5)   | 0.234 (4)   |
| H16A | 1.0931      | -0.0081      | 0.3979       | 0.281*      |
| H16B | 1.2796      | -0.1797      | 0.4169       | 0.281*      |
| C17  | 0.871 (3)   | -0.174 (2)   | 0.4376 (6)   | 0.354 (8)   |
| H17A | 0.7798      | -0.2200      | 0.4127       | 0.532*      |
| H17B | 0.7567      | -0.0782      | 0.4517       | 0.532*      |
| H17C | 0.9416      | -0.2506      | 0.4697       | 0.532*      |
| C18  | 0.4326 (15) | 0.3219 (13)  | 0.4342 (3)   | 0.199 (4)   |
| H18A | 0.2674      | 0.3892       | 0.4214       | 0.299*      |
| H18B | 0.4512      | 0.3286       | 0.4749       | 0.299*      |
| H18C | 0.4511      | 0.2120       | 0.4271       | 0.299*      |
| C19  | 0.6347 (12) | 0.3784 (9)   | 0.4011 (2)   | 0.128 (2)   |
| H19A | 0.6013      | 0.4930       | 0.4048       | 0.153*      |
| H19B | 0.7984      | 0.3228       | 0.4190       | 0.153*      |
| C20  | 0.6506 (9)  | 0.3515 (7)   | 0.33830 (17) | 0.1047 (16) |
| H20A | 0.6801      | 0.2372       | 0.3348       | 0.126*      |
| H20B | 0.4874      | 0.4087       | 0.3205       | 0.126*      |
| C21  | 0.8498 (8)  | 0.4030 (6)   | 0.30517 (15) | 0.0792 (11) |
| H21A | 1.0100      | 0.3552       | 0.3256       | 0.095*      |
| H21B | 0.8094      | 0.5193       | 0.3052       | 0.095*      |
| C22  | 0.8869 (6)  | 0.3602 (5)   | 0.24259 (13) | 0.0622 (8)  |
| H22A | 0.9119      | 0.2454       | 0.2415       | 0.075*      |

|      |            |            |              |            |
|------|------------|------------|--------------|------------|
| H22B | 0.7347     | 0.4179     | 0.2204       | 0.075*     |
| C23  | 1.1117 (5) | 0.4022 (3) | 0.21493 (11) | 0.0448 (6) |
| H23A | 1.2552     | 0.3600     | 0.2413       | 0.054*     |
| H23B | 1.0724     | 0.5189     | 0.2111       | 0.054*     |

Atomic displacement parameters ( $\text{\AA}^2$ )

|     | $U^{11}$       | $U^{22}$       | $U^{33}$       | $U^{12}$        | $U^{13}$        | $U^{23}$        |
|-----|----------------|----------------|----------------|-----------------|-----------------|-----------------|
| S1  | 0.0513 (4)     | 0.0284 (3)     | 0.0495 (4)     | -0.0186<br>(3)  | -0.0068<br>(3)  | 0.0001 (2)      |
| N1  | 0.0383<br>(10) | 0.0314<br>(10) | 0.0340 (9)     | -0.0131<br>(8)  | -0.0023<br>(8)  | -0.0001<br>(8)  |
| C1  | 0.0374<br>(12) | 0.0246<br>(11) | 0.0362<br>(11) | -0.0113<br>(9)  | 0.0015 (9)      | -0.0002<br>(8)  |
| C2  | 0.0347<br>(11) | 0.0272<br>(11) | 0.0329<br>(11) | -0.0121<br>(9)  | 0.0028 (9)      | -0.0040<br>(8)  |
| C3  | 0.0349<br>(11) | 0.0287<br>(11) | 0.0322<br>(11) | -0.0112<br>(9)  | 0.0017 (9)      | -0.0011<br>(8)  |
| C4  | 0.0359<br>(12) | 0.0349<br>(12) | 0.0315<br>(11) | -0.0147<br>(9)  | 0.0011 (9)      | -0.0023<br>(9)  |
| C5  | 0.0364<br>(12) | 0.0340<br>(12) | 0.0333<br>(11) | -0.0157<br>(10) | 0.0012 (9)      | -0.0044<br>(9)  |
| C6  | 0.0438<br>(13) | 0.0423<br>(14) | 0.0385<br>(12) | -0.0215<br>(11) | -0.0018<br>(10) | -0.0037<br>(10) |
| C7  | 0.0528<br>(15) | 0.0405<br>(14) | 0.0491<br>(14) | -0.0270<br>(12) | -0.0031<br>(11) | -0.0053<br>(11) |
| C8  | 0.0369<br>(12) | 0.0278<br>(11) | 0.0343<br>(11) | -0.0137<br>(9)  | 0.0033 (9)      | -0.0033<br>(9)  |
| C9  | 0.0387<br>(12) | 0.0362<br>(13) | 0.0376<br>(12) | -0.0162<br>(10) | -0.0054<br>(9)  | 0.0004 (9)      |
| C10 | 0.0412<br>(13) | 0.0379<br>(13) | 0.0406<br>(12) | -0.0152<br>(10) | -0.0056<br>(10) | -0.0003<br>(10) |
| C11 | 0.0433<br>(14) | 0.0472<br>(16) | 0.0584<br>(16) | -0.0154<br>(12) | -0.0130<br>(12) | 0.0056<br>(12)  |
| C12 | 0.0527<br>(16) | 0.0431<br>(15) | 0.0599<br>(17) | -0.0082<br>(12) | -0.0113<br>(13) | 0.0024<br>(12)  |
| C13 | 0.072 (2)      | 0.0502<br>(18) | 0.0634<br>(18) | -0.0238<br>(15) | -0.0131<br>(15) | 0.0093<br>(14)  |

|     |                |                |                |                 |                 |                 |
|-----|----------------|----------------|----------------|-----------------|-----------------|-----------------|
| C14 | 0.087 (3)      | 0.093 (3)      | 0.073 (2)      | -0.037 (2)      | 0.001 (2)       | -0.001 (2)      |
| C15 | 0.130 (4)      | 0.149 (5)      | 0.083 (3)      | -0.058 (4)      | 0.010 (3)       | 0.009 (3)       |
| C16 | 0.232 (8)      | 0.266 (9)      | 0.210 (7)      | -0.083 (7)      | 0.006 (7)       | -0.015 (7)      |
| C17 | 0.341 (15)     | 0.428 (18)     | 0.317 (14)     | -0.163<br>(13)  | 0.024 (13)      | 0.010 (13)      |
| C18 | 0.156 (6)      | 0.355 (12)     | 0.112 (5)      | -0.124 (7)      | 0.037 (5)       | 0.002 (6)       |
| C19 | 0.125 (4)      | 0.196 (6)      | 0.068 (3)      | -0.060 (4)      | 0.016 (3)       | -0.004 (3)      |
| C20 | 0.099 (3)      | 0.169 (5)      | 0.062 (2)      | -0.064 (3)      | 0.013 (2)       | -0.018 (3)      |
| C21 | 0.084 (3)      | 0.106 (3)      | 0.0532<br>(18) | -0.036 (2)      | 0.0112<br>(17)  | -0.0163<br>(19) |
| C22 | 0.0632<br>(19) | 0.083 (2)      | 0.0488<br>(16) | -0.0336<br>(17) | 0.0062<br>(14)  | -0.0123<br>(15) |
| C23 | 0.0529<br>(15) | 0.0446<br>(15) | 0.0396<br>(13) | -0.0185<br>(12) | -0.0081<br>(11) | -0.0030<br>(11) |

Geometric parameters (Å, °)

|                    |           |          |            |
|--------------------|-----------|----------|------------|
| S1—C7              | 1.718 (3) | C13—C14  | 1.506 (5)  |
| S1—C8              | 1.720 (2) | C14—H14A | 0.9700     |
| N1—C3              | 1.390 (3) | C14—H14B | 0.9700     |
| N1—C4              | 1.311 (3) | C14—C15  | 1.514 (6)  |
| C1—H1              | 0.9300    | C15—H15A | 0.9700     |
| C1—C2              | 1.394 (3) | C15—H15B | 0.9700     |
| C1—C3 <sup>i</sup> | 1.391 (3) | C15—C16  | 1.475 (11) |
| C2—C3              | 1.428 (3) | C16—H16A | 0.9700     |
| C2—C8              | 1.430 (3) | C16—H16B | 0.9700     |
| C3—C1 <sup>i</sup> | 1.391 (3) | C16—C17  | 1.768 (15) |
| C4—C5              | 1.438 (3) | C17—H17A | 0.9600     |
| C4—C9              | 1.519 (3) | C17—H17B | 0.9600     |
| C5—C6              | 1.440 (3) | C17—H17C | 0.9600     |
| C5—C8              | 1.387 (3) | C18—H18A | 0.9600     |
| C6—H6              | 0.9300    | C18—H18B | 0.9600     |
| C6—C7              | 1.347 (4) | C18—H18C | 0.9600     |
| C7—H7              | 0.9300    | C18—C19  | 1.516 (8)  |
| C9—H9              | 0.9800    | C19—H19A | 0.9700     |

|                        |             |                   |           |
|------------------------|-------------|-------------------|-----------|
| C9—C10                 | 1.531 (3)   | C19—H19B          | 0.9700    |
| C9—C23                 | 1.543 (3)   | C19—C20           | 1.489 (6) |
| C10—H10A               | 0.9700      | C20—H20A          | 0.9700    |
| C10—H10B               | 0.9700      | C20—H20B          | 0.9700    |
| C10—C11                | 1.530 (3)   | C20—C21           | 1.481 (5) |
| C11—H11A               | 0.9700      | C21—H21A          | 0.9700    |
| C11—H11B               | 0.9700      | C21—H21B          | 0.9700    |
| C11—C12                | 1.522 (4)   | C21—C22           | 1.522 (4) |
| C12—H12A               | 0.9700      | C22—H22A          | 0.9700    |
| C12—H12B               | 0.9700      | C22—H22B          | 0.9700    |
| C12—C13                | 1.522 (4)   | C22—C23           | 1.510 (4) |
| C13—H13A               | 0.9700      | C23—H23A          | 0.9700    |
| C13—H13B               | 0.9700      | C23—H23B          | 0.9700    |
|                        |             |                   |           |
| C7—S1—C8               | 91.43 (11)  | C13—C14—C15       | 113.0 (4) |
| C4—N1—C3               | 119.2 (2)   | H14A—C14—<br>H14B | 107.8     |
| C2—C1—H1               | 119.4       | C15—C14—H14A      | 109.0     |
| C3 <sup>i</sup> —C1—H1 | 119.4       | C15—C14—H14B      | 109.0     |
| C3 <sup>i</sup> —C1—C2 | 121.2 (2)   | C14—C15—H15A      | 109.0     |
| C1—C2—C3               | 120.0 (2)   | C14—C15—H15B      | 109.0     |
| C1—C2—C8               | 124.8 (2)   | H15A—C15—<br>H15B | 107.8     |
| C3—C2—C8               | 115.2 (2)   | C16—C15—C14       | 112.8 (6) |
| N1—C3—C1 <sup>i</sup>  | 117.7 (2)   | C16—C15—H15A      | 109.0     |
| N1—C3—C2               | 123.6 (2)   | C16—C15—H15B      | 109.0     |
| C1 <sup>i</sup> —C3—C2 | 118.8 (2)   | C15—C16—H16A      | 109.4     |
| N1—C4—C5               | 122.2 (2)   | C15—C16—H16B      | 109.4     |
| N1—C4—C9               | 118.9 (2)   | C15—C16—C17       | 111.1 (9) |
| C5—C4—C9               | 118.90 (19) | H16A—C16—<br>H16B | 108.0     |
| C4—C5—C6               | 129.7 (2)   | C17—C16—H16A      | 109.4     |
| C8—C5—C4               | 118.9 (2)   | C17—C16—H16B      | 109.4     |

|                   |             |                   |           |
|-------------------|-------------|-------------------|-----------|
| C8—C5—C6          | 111.5 (2)   | C16—C17—H17A      | 109.5     |
| C5—C6—H6          | 123.8       | C16—C17—H17B      | 109.5     |
| C7—C6—C5          | 112.4 (2)   | C16—C17—H17C      | 109.5     |
| C7—C6—H6          | 123.8       | H17A—C17—<br>H17B | 109.5     |
| S1—C7—H7          | 123.5       | H17A—C17—<br>H17C | 109.5     |
| C6—C7—S1          | 113.01 (19) | H17B—C17—<br>H17C | 109.5     |
| C6—C7—H7          | 123.5       | H18A—C18—<br>H18B | 109.5     |
| C2—C8—S1          | 127.25 (18) | H18A—C18—<br>H18C | 109.5     |
| C5—C8—S1          | 111.72 (16) | H18B—C18—<br>H18C | 109.5     |
| C5—C8—C2          | 121.0 (2)   | C19—C18—H18A      | 109.5     |
| C4—C9—H9          | 106.6       | C19—C18—H18B      | 109.5     |
| C4—C9—C10         | 112.35 (18) | C19—C18—H18C      | 109.5     |
| C4—C9—C23         | 110.9 (2)   | C18—C19—H19A      | 108.6     |
| C10—C9—H9         | 106.6       | C18—C19—H19B      | 108.6     |
| C10—C9—C23        | 113.3 (2)   | H19A—C19—<br>H19B | 107.6     |
| C23—C9—H9         | 106.6       | C20—C19—C18       | 114.7 (5) |
| C9—C10—H10A       | 108.7       | C20—C19—H19A      | 108.6     |
| C9—C10—H10B       | 108.7       | C20—C19—H19B      | 108.6     |
| H10A—C10—<br>H10B | 107.6       | C19—C20—H20A      | 108.3     |
| C11—C10—C9        | 114.1 (2)   | C19—C20—H20B      | 108.3     |
| C11—C10—H10A      | 108.7       | H20A—C20—<br>H20B | 107.4     |
| C11—C10—H10B      | 108.7       | C21—C20—C19       | 115.8 (4) |
| C10—C11—H11A      | 108.8       | C21—C20—H20A      | 108.3     |
| C10—C11—H11B      | 108.8       | C21—C20—H20B      | 108.3     |
| H11A—C11—<br>H11B | 107.7       | C20—C21—H21A      | 108.2     |

|                          |            |                          |             |
|--------------------------|------------|--------------------------|-------------|
| C12—C11—C10              | 113.6 (2)  | C20—C21—H21B             | 108.2       |
| C12—C11—H11A             | 108.8      | C20—C21—C22              | 116.4 (3)   |
| C12—C11—H11B             | 108.8      | H21A—C21—<br>H21B        | 107.4       |
| C11—C12—H12A             | 108.5      | C22—C21—H21A             | 108.2       |
| C11—C12—H12B             | 108.5      | C22—C21—H21B             | 108.2       |
| H12A—C12—<br>H12B        | 107.5      | C21—C22—H22A             | 109.2       |
| C13—C12—C11              | 115.0 (2)  | C21—C22—H22B             | 109.2       |
| C13—C12—H12A             | 108.5      | H22A—C22—<br>H22B        | 107.9       |
| C13—C12—H12B             | 108.5      | C23—C22—C21              | 112.0 (3)   |
| C12—C13—H13A             | 108.5      | C23—C22—H22A             | 109.2       |
| C12—C13—H13B             | 108.5      | C23—C22—H22B             | 109.2       |
| H13A—C13—<br>H13B        | 107.5      | C9—C23—H23A              | 108.1       |
| C14—C13—C12              | 115.1 (3)  | C9—C23—H23B              | 108.1       |
| C14—C13—H13A             | 108.5      | C22—C23—C9               | 116.8 (2)   |
| C14—C13—H13B             | 108.5      | C22—C23—H23A             | 108.1       |
| C13—C14—H14A             | 109.0      | C22—C23—H23B             | 108.1       |
| C13—C14—H14B             | 109.0      | H23A—C23—<br>H23B        | 107.3       |
|                          |            |                          |             |
| N1—C4—C5—C6              | -179.5 (2) | C5—C6—C7—S1              | -1.0 (3)    |
| N1—C4—C5—C8              | 0.0 (3)    | C6—C5—C8—S1              | -0.8 (3)    |
| N1—C4—C9—<br>C10         | 19.4 (3)   | C6—C5—C8—C2              | 178.10 (19) |
| N1—C4—C9—<br>C23         | -108.6 (2) | C7—S1—C8—C2              | -178.6 (2)  |
| C1—C2—C3—N1              | 179.7 (2)  | C7—S1—C8—C5              | 0.19 (18)   |
| C1—C2—C3—C1 <sup>i</sup> | 0.1 (4)    | C8—S1—C7—C6              | 0.5 (2)     |
| C1—C2—C8—S1              | 0.1 (3)    | C8—C2—C3—N1              | -0.7 (3)    |
| C1—C2—C8—C5              | -178.6 (2) | C8—C2—C3—C1 <sup>i</sup> | 179.74 (19) |
| C3—N1—C4—C5              | 1.1 (3)    | C8—C5—C6—C7              | 1.2 (3)     |

|                           |              |                     |            |
|---------------------------|--------------|---------------------|------------|
| C3—N1—C4—C9               | -179.08 (19) | C9—C4—C5—C6         | 0.6 (4)    |
| C3 <sup>i</sup> —C1—C2—C3 | -0.1 (4)     | C9—C4—C5—C8         | -179.8 (2) |
| C3 <sup>i</sup> —C1—C2—C8 | -179.7 (2)   | C9—C10—C11—<br>C12  | 168.4 (2)  |
| C3—C2—C8—S1               | -179.49 (16) | C10—C9—C23—<br>C22  | -58.2 (3)  |
| C3—C2—C8—C5               | 1.8 (3)      | C10—C11—<br>C12—C13 | -68.2 (3)  |
| C4—N1—C3—C1 <sup>i</sup>  | 178.8 (2)    | C11—C12—<br>C13—C14 | -65.1 (4)  |
| C4—N1—C3—C2               | -0.7 (3)     | C12—C13—<br>C14—C15 | 178.3 (4)  |
| C4—C5—C6—C7               | -179.2 (2)   | C13—C14—<br>C15—C16 | -178.2 (6) |
| C4—C5—C8—S1               | 179.58 (16)  | C14—C15—<br>C16—C17 | 179.1 (8)  |
| C4—C5—C8—C2               | -1.5 (3)     | C18—C19—<br>C20—C21 | -178.9 (6) |
| C4—C9—C10—<br>C11         | 168.1 (2)    | C19—C20—<br>C21—C22 | 173.7 (5)  |
| C4—C9—C23—<br>C22         | 69.2 (3)     | C20—C21—<br>C22—C23 | -173.9 (4) |
| C5—C4—C9—<br>C10          | -160.7 (2)   | C21—C22—<br>C23—C9  | 170.5 (3)  |
| C5—C4—C9—<br>C23          | 71.3 (3)     | C23—C9—C10—<br>C11  | -65.2 (3)  |

Symmetry code: (i)  $-x+1, -y+1, -z$ .
